# Supplementary material
Source: Royal Society of Chemistry journal article supplement (https://www.rsc.org/suppdata/cc/1999/2331/907873h.doc)
Supplement: Supplementary file 1 [file 907873h.doc]

Supplementary Material

*Selected spectroscopic data for* **1a**: 1H NMR (300 MHz, CD2Cl2, 25 ºC, Me4Si);  0.97 and 1.15 (2 x d, 3H, J 7 Hz, CH*Me2* ), 2.30 (s, 9H, C6Me3), 2.64 (m, 1H, C*H*Me2), 4.39 (ddd, 1H, J 10, 5, 3 Hz, NCH), 4.72 (t, 1H, J 10 Hz, OC*H*H') 4.90 (dd, 1H, J 10, 5 Hz, OCH*H'*),5.77 (s, 3H, C6H3), 7.87 (m, 2H, py-H), 8.12 (m, 1H, py-4-H), 9.22 (d, 1H, J 5.5 Hz, py-6-H) signals for **1b** have been reported previously in ref. 7. **2a**[**2b**]: 1H NMR (300 MHz, d6-acetone, 25 ºC, Me4Si);  1.06 and 1.22 [0.83 and 1.09] (2 x d, 3H, J 7 Hz, CH*Me2*), 2.40 [2.37] (s, 9H, C6Me3), 2.89 [2.37] (m, 1H, C*H*Me2), 4.53* (ddd, 1H, J 10, 5, 3 Hz, NCH), 4.83* (t, 1H, J 10 Hz, OC*H*H') 5.20* (dd, 1H, J 10, 5 Hz, OCH*H'*), 6.23 [5.78] (s, 3H, C6H3), 7.96 (m, 1H, py-5-H), 8.08 (m, 1H, py-3-H), 8.34 (m, 1H, py-4-H), 9.61 [9.51] (d, 1H, J 5.5 Hz, py-6-H).* The 3H protons of the oxazoline in **2b** occur as complex overlapping multiplets at 5.09, where only one value is given both isomers occur at the same shift. Anal. Calcd for C20H26BrF6N2ORuSb: C, 33.04; H, 3.60; N, 3.85 Found C, 33.20; H, 3.38; N, 3.66%. *For* **3a**[**3b**]: 1H NMR (300 MHz, d6-acetone, 25 ºC, Me4Si);  1.09 and 1.21 [0.85 and 1.11](2 x d, 3H, J 7 Hz, CH*Me2*)2.42 [2.42](s, 9H, C6Me3), 2.89 [2.40](m, 1H, C*H*Me2), 4.50* (ddd, 1H, J 10, 5, 3 Hz, NCH), 4.85* (t, 1H, J 10 Hz, OC*H*H'), 5.20* (dd, 1H, J 10, 5 Hz, OCH*H'*), 6.36 [5.92](s, 3H, C6H3), 7.93 (m, 1H, py-5-H), 8.09 (m, 1H, py-3-H), 8.33 (m, 1H, py-4-H), 9.60 [9.52](d, 1H, J 6 Hz, py-6-H).* The 3H protons of the oxazoline in **3b** occur as complex overlapping multiplets at 5.09, where only one value is given both isomers occur at the same shift. Anal. Calcd for C20H26F6IN2ORuSb: C, 31.03; H, 3.39; N, 3.62 Found C, 31.57; H, 3.28; N, 3.61%.
